# Supplementary material for: Childhood trauma, suicide risk and inflammatory phenotypes of depression: insights from monocyte gene expression
Source: Springer Nature journal article supplement (doi:10.1038/s41398-020-00979-z), 2020-08-24

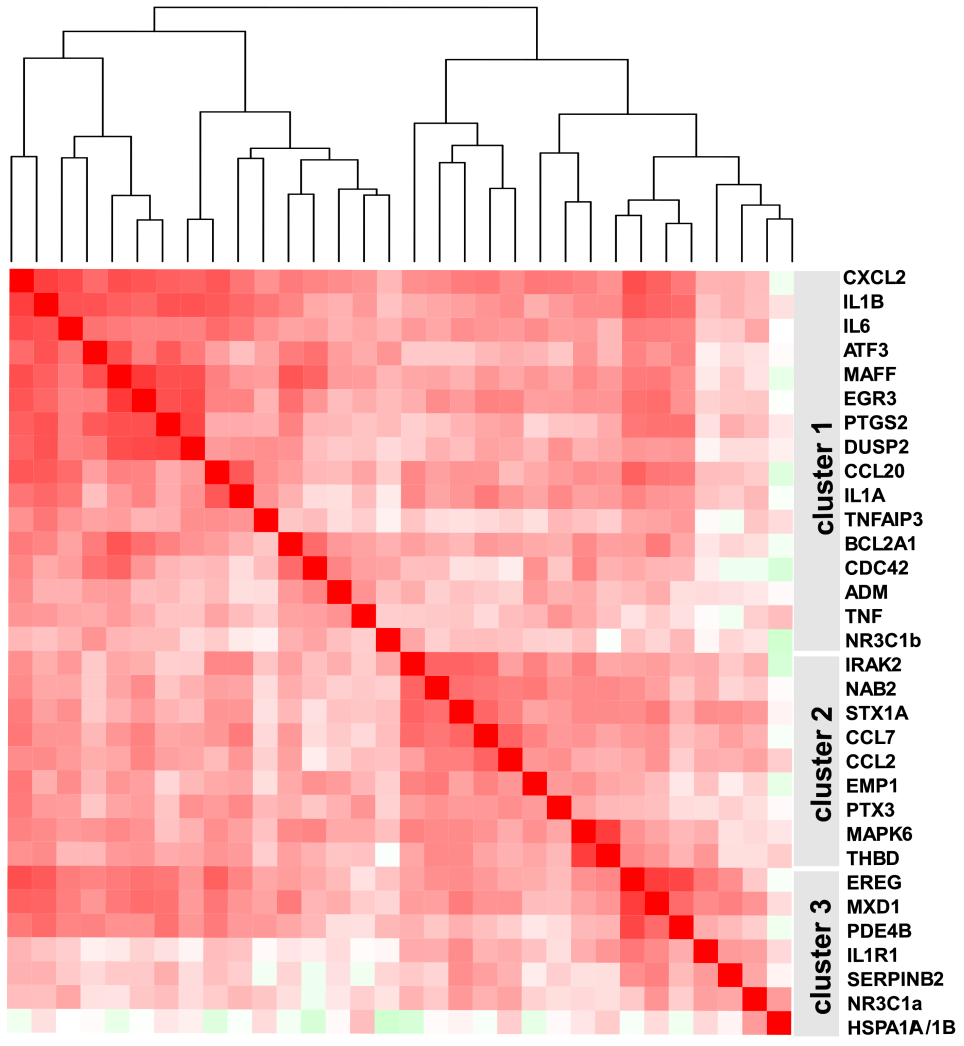

Supplement: MOESM5 [file 41398_2020_979_MOESM5_ESM.pdf]
