# Supplementary material for: Childhood trauma, suicide risk and inflammatory phenotypes of depression: insights from monocyte gene expression
Source: Transl Psychiatry. 2020 Aug 24;10:296. doi: 10.1038/s41398-020-00979-z (PMC7445278; doi:10.1038/s41398-020-00979-z)
Supplement: Supplementary file 2 — Supplementary Table 1 [file 41398_2020_979_MOESM2_ESM.xlsx]

## Sheet: Sheet1
A		Control group			MDD group							B	MDD group
		total n	mean/median	sd/range	total n	mean/median	sd	χ2/z/t score	p value	sig,			treatment	n	percentage
Sex, female		151	0.62	-	197	0.62	-	0	1	ns			none	10	5.9
Age		150	38.52	13.2	197	39.15	12.54	-0.45	0.65	ns			SSRI/SNRI	95	48
BMI		150	23.85	3.4	197	25.1	4.83	-2.81	0.005	***			TCA/TeCA	61	35.9
IDSC		113	7.34	5.4	195	32.28	10.83	-13.89	<0.001	***			Benzodiazepine	43	25.3
CTQ sum score		146	35.59	10	163	41.94	13.83	-4.75	<0.001	***			Lithium	16	9.4
CA on any subscale, n(%)		151	0.37	-	175	103(59)	-	14.52	<0.001	***			Other AD	79	39.9
hsCRP		142	1.31	1.77	181	1.96	2.61	1.89	0.060	ns
IL-6 (median/range)		92	0.97	11.27	134	1.09	63.94	-2.12	0.034	ns
Age of onset		-	-	-	172	29.51	13.73	-	-	-
Episodes		-	-	-	170	2.59	3.42	-	-	-
Suicide risk high, n(%)		-	-	-	186	42(23)	-	-	-	-
Unmedicated, n(%)					170	10(6)	-	-	-	-
