# Supplementary material for: Childhood trauma, suicide risk and inflammatory phenotypes of depression: insights from monocyte gene expression
Source: Transl Psychiatry. 2020 Aug 24;10:296. doi: 10.1038/s41398-020-00979-z (PMC7445278; doi:10.1038/s41398-020-00979-z)
Supplement: Supplementary file 4 — Supplementary Table 2 [file 41398_2020_979_MOESM4_ESM.xlsx]

## Sheet: Sheet1
Table S4. Supplementary Information for table 1: p values adjusted for FDR with BH method
Pairwise proportion test adjusted with BH
	cluster	mixed	up
suicide risk high	up	1
	down	0.096	0.32
childhood adversity	up	1
	down	0.27	0.41
Dunn's test adjusted with BH
	cluster	mixed	up
CTQ Sum	up	0.419
	down	0,015*	0.108
