# Supplementary material for: Childhood trauma, suicide risk and inflammatory phenotypes of depression: insights from monocyte gene expression
Source: Transl Psychiatry. 2020 Aug 24;10:296. doi: 10.1038/s41398-020-00979-z (PMC7445278; doi:10.1038/s41398-020-00979-z)
Supplement: Supplementary file 6 — Supplementary Table 3 [file 41398_2020_979_MOESM6_ESM.xlsx]

## Sheet: Sheet1
P values not adjusted for multiple testing within groups. Significant p values (P<0.05) are printed in bold. HC+CA: Healthy controls with childhood adversity. MDD: Major Depressive Disorder. CA: Childhood adversity; SR= Suicide risk												P values adjusted with Benjamini-Hochberg method for multiple testing within groups and within clusters. Significant p avlues or trends for significance (P<0.1) are printed in bold.
	Childhood adversity						Suicide risk							Childhood adversity			Suicide risk
Genes	HC+CA		MDD-CA	MDD+CA		Genes	MDD-SR	MDD+SR	MDD++SR	MDD+++SR		Genes	MDD-CA	MDD+CA		Genes	MDD-SR	MDD+SR	MDD++SR	MDD+++SR
	n=56		n= 72	n= 103			n= 41	n= 56	n= 47	n= 42			n= 72	n= 103			n= 41	n= 56	n= 47	n= 42
ADM	0.240178		0.0651621	0.0287439		ADM	0.0513435	0.18458	0.431136	0.141609		ADM	0.209	0.066		ADM	0.238	0.436	0.575	0.206
ATF3	0.713643		0.206343	0.935826		ATF3	0.338709	0.14607	0.163031	0.89857		ATF3	0.367	0.936		ATF3	0.576	0.436	0.477	0.958
BCL2A1	0.320082		0.0350733	0.0239197		BCL2A1	0.359869	0.403733	0.262488	0.00739402		BCL2A1	0.14	0.064		BCL2A1	0.576	0.59	0.477	0.089
CCL20	0.332646		0.233492	0.0211788		CCL20	0.984458	0.741695	0.00936849	0.0382452		CCL20	0.374	0.064		CCL20	0.984	0.913	0.15	0.089
CDC42	0.813445		0.18711	0.0057743		CDC42	0.119418	0.0429554	0.161865	0.0936537		CDC42	0.367	0.023		CDC42	0.382	0.229	0.477	0.166
CXCL2	0.83379		0.581746	0.00485568		CXCL2	0.866462	0.262434	0.86184	0.0386697		CXCL2	0.776	0.023		CXCL2	0.924	0.525	0.862	0.089
DUSP2	0.931887		0.673648	0.00487071		DUSP2	0.751153	0.980253	0.298071	0.0446642		DUSP2	0.829	0.023		DUSP2	0.924	0.98	0.477	0.089
EGR3	0.247579		0.319243	0.6509		EGR3	0.406734	0.405888	0.278112	0.960024		EGR3	0.464	0.694		EGR3	0.592	0.59	0.477	0.96
IL1A	0.974854		0.202298	0.139415		IL1A	0.850221	0.31917	0.245745	0.123821		IL1A	0.367	0.203		IL1A	0.924	0.567	0.477	0.198
IL1B	0.666617		0.736835	0.0664524		IL1B	0.655057	0.675841	0.395901	0.0445644		IL1B	0.842	0.118		IL1B	0.873	0.901	0.575	0.089
IL6	0.73985		0.901789	0.242115		IL6	0.177703	0.943883	0.78696	0.0190985		IL6	0.958	0.323		IL6	0.421	0.98	0.839	0.089
MAFF	0.960275		0.141012	0.00112105		MAFF	0.184239	0.1908	0.231899	0.0328309		MAFF	0.367	0.018		MAFF	0.421	0.436	0.477	0.089
NR3C1b	0.460007		0.958455	0.431497		NR3C1b	0.328865	0.826348	0.251105	0.169652		NR3C1b	0.958	0.531		NR3C1b	0.576	0.944	0.477	0.226
PTGS2	0.112778		0.0233793	0.0638193		PTGS2	0.0323726	0.0350118	0.039452	0.415301		PTGS2	0.14	0.118		PTGS2	0.238	0.229	0.316	0.511
TNF	0.203101		0.00140781	0.0778217		TNF	0.0140285	0.107116	0.629009	0.0396331		TNF	0.023	0.125		TNF	0.224	0.428	0.719	0.089
TNFAIP3	0.884066		0.0302265	0.575315		TNFAIP3	0.0594	0.0316084	0.590768	0.622805		TNFAIP3	0.14	0.658		TNFAIP3	0.238	0.229	0.719	0.712
NAB2	0.878209		0.163251	0.0917683		NAB2	0.615301	0.197329	0.598398	0.269101		NAB2	0.294	0.118		NAB2	0.841	0.254	0.8	0.303
IRAK2	0.865136		0.0364314	0.0152171		IRAK2	0.747667	0.0971227	0.17102	0.00988435		IRAK2	0.165	0.04		IRAK2	0.841	0.199	0.513	0.086
STX1A	0.66282		0.849018	0.567865		STX1A	0.679917	0.861466	0.810858	0.243594		STX1A	0.928	0.568		STX1A	0.841	0.861	0.834	0.303
CCL7	0.809307		0.095627	0.0214253		CCL7	0.0792457	0.128905	0.6221	0.151863		CCL7	0.215	0.04		CCL7	0.357	0.199	0.8	0.228
CCL2	0.635406		0.928486	0.525129		CCL2	0.941656	0.276836	0.0334431	0.615367		CCL2	0.928	0.568		CCL2	0.942	0.311	0.301	0.615
EMP1	0.755493		0.0367071	0.0219731		EMP1	0.158715	0.00242288	0.834056	0.0304752		EMP1	0.165	0.04		EMP1	0.357	0.022	0.834	0.091
PTX3	0.781542		0.198623	0.0278262		PTX3	0.222895	0.132532	0.391574	0.0563348		PTX3	0.298	0.042		PTX3	0.401	0.199	0.705	0.107
MAPK6	0.61667		0.0737126	6.68926e-05		MAPK6	0.13198	0.0087181	0.14667	0.019011		MAPK6	0.215	0.001		MAPK6	0.357	0.039	0.513	0.086
THBD	0.740096		0.333111	0.000669959		THBD	0.1083	0.0391944	0.363845	0.0593252		THBD	0.428	0.003		THBD	0.357	0.118	0.705	0.107
IL1R1	0.602584		0.0414487	0.322163		IL1R1	0.656344	0.8244	0.68467	0.889128		IL1R1	0.073	0.482		IL1R1	0.856	0.824	0.799	0.965
MXD1	0.684091		0.747493	0.0342273		MXD1	0.156562	0.730743	0.398677	0.0784377		MXD1	0.747	0.24		MXD1	0.274	0.824	0.698	0.396
HSPA1A_HSPA1B	0.920868		0.209221	0.0803983		HSPA1A_HSPA1B	0.855876	0.381775	0.916283	0.188198		HSPA1A_HSPA1B	0.293	0.281		HSPA1A_HSPA1B	0.856	0.668	0.916	0.396
EREG	0.364977		0.00411296	0.568833		EREG	0.00596896	0.152587	0.0675417	0.226335		EREG	0.01	0.569		EREG	0.014	0.502	0.473	0.396
PDE4B	0.193163		0.000119103	0.224685		PDE4B	1.7877e-05	6.47253e-05	0.386061	0.578847		PDE4B	0.001	0.482		PDE4B	0	0	0.698	0.81
SERPINB2	0.249614		0.303385	0.422541		SERPINB2	0.836229	0.580063	0.544995	0.226055		SERPINB2	0.354	0.493		SERPINB2	0.856	0.812	0.763	0.396
NR3C1a	0.254575		0.00186199	0.344495		NR3C1a	0.0011725	0.215109	0.248665	0.964639		NR3C1a	0.007	0.482		NR3C1a	0.004	0.502	0.698	0.965
