# Supplementary material for: Childhood trauma, suicide risk and inflammatory phenotypes of depression: insights from monocyte gene expression
Source: Transl Psychiatry. 2020 Aug 24;10:296. doi: 10.1038/s41398-020-00979-z (PMC7445278; doi:10.1038/s41398-020-00979-z)
Supplement: Supplementary file 7 — Supplementary Table 4 [file 41398_2020_979_MOESM7_ESM.xlsx]

## Sheet: Sheet1
MDD patients: Spearman's R and adjusted p value						Healthy Controls: Spearman's R and adjusted p value
	hsCRP		IL-6				hsCRP		IL-6
	r	p	r	p			r	p	r	p
	n=181		n=134				n=142		n=92
hsCRP	1	0	0.374696	0		hsCRP	1	0	0.212147	0.042
IL-6	0.374696	0	1	0		IL-6	0.212147	0.052	1	0
ADM	0.0350582	0.673	0.0820665	0.38		ADM	0.178925	0.042	0.10214	0.382
ATF3	-0.0624432	0.44	0.00317462	0.976		ATF3	0.126054	0.164	0.0807777	0.496
BCL2A1	-0.008006	0.928	0.00869842	0.931		BCL2A1	0.106918	0.243	0.0185106	0.881
CCL2	-0.0174236	0.84	0.0156562	0.874		CCL2	-0.000991218	0.991	-0.0767936	0.518
CCL20	-0.163846	0.035	-0.0424468	0.665		CCL20	0.0895074	0.337	-0.0699812	0.554
CCL7	-0.100052	0.242	-0.0676699	0.508		CCL7	-0.0505417	0.598	0.0464769	0.697
CDC42	-0.0165139	0.846	0.00969594	0.926		CDC42	0.123421	0.173	0.0562566	0.644
CXCL2	-0.0526927	0.519	-0.0508937	0.595		CXCL2	0.0773507	0.41	-0.0195355	0.877
DUSP2	-0.050814	0.537	-0.0635815	0.508		DUSP2	0.057761	0.545	0.0261399	0.836
EGR3	-0.029387	0.735	-0.000213842	0.998		EGR3	0.0727028	0.448	-0.024876	0.846
EMP1	0.0459283	0.576	0.0524399	0.584		EMP1	0.0436149	0.653	-0.011021	0.934
EREG	-0.0689536	0.391	-0.00216214	0.982		EREG	0.0636832	0.504	0.0537825	0.654
HSPA1A_HSPA1B	-0.00221675	0.98	0.026258	0.793		HSPA1A_HSPA1B	-0.00831115	0.937	-0.00808394	0.947
IL1A	-0.136493	0.091	-0.064075	0.513		IL1A	0.00667623	0.947	-0.136402	0.231
IL1B	-0.0374953	0.654	-0.0422427	0.663		IL1B	0.0596428	0.532	0.0313185	0.8
IL1R1	-0.0378029	0.652	-0.057218	0.547		IL1R1	0.0623566	0.512	-0.165439	0.14
IL6	-0.034663	0.676	0.0395644	0.68		IL6	0.0784089	0.404	0.00810706	0.947
IRAK2	-0.108062	0.168	-0.01916	0.846		IRAK2	0.0649992	0.496	0.077911	0.512
MAFF	-0.0133417	0.874	-0.0204243	0.84		MAFF	0.0660449	0.49	0.0973309	0.406
MAPK6	-0.0722402	0.369	-0.0764977	0.415		MAPK6	0.084853	0.363	-0.0274346	0.828
MXD1	0.0342309	0.679	0.134489	0.138		MXD1	0.0311259	0.746	0.0527113	0.66
NAB2	-0.0815592	0.306	-0.0423998	0.663		NAB2	-0.00782916	0.94	-0.00178787	0.988
NR3C1a	0.0157975	0.851	0.0291202	0.766		NR3C1a	0.118313	0.193	-0.243582	0.025
NR3C1b	-0.0509292	0.543	0.0607168	0.53		NR3C1b	0.0647289	0.496	-0.0702278	0.553
PDE4B	-0.103479	0.186	-0.122132	0.18		PDE4B	-0.0160691	0.874	-0.0505997	0.671
PTGS2	-0.0167304	0.846	-0.00610236	0.951		PTGS2	0.0344558	0.72	0.00423848	0.973
PTX3	-0.169425	0.027	-0.0354146	0.715		PTX3	0.026283	0.79	-0.0520177	0.663
SERPINB2	-0.0570141	0.492	-0.00710379	0.944		SERPINB2	-0.0180829	0.858	-0.14434	0.203
STX1A	-0.127385	0.11	0.0329813	0.741		STX1A	0.0968795	0.294	0.0152508	0.903
THBD	-0.067854	0.406	-0.084082	0.377		THBD	0.0149982	0.881	0.0580903	0.632
TNF	-0.09234	0.25	-0.0282454	0.777		TNF	-0.00479683	0.962	0.0235274	0.853
TNFAIP3	-0.0720912	0.377	-0.104123	0.265		TNFAIP3	0.153607	0.083	0.0175165	0.887
